# Supplementary material for: Transcriptome profiling in conifers and the PiceaGenExpress database show patterns of diversification within gene families and interspecific conservation in vascular gene expression
Source: PubMed Central journal article supplement (PMC3534630; doi:10.1186/1471-2164-13-434), 2012-08-29

### A. Impact of 1 Mismatch on Intensities

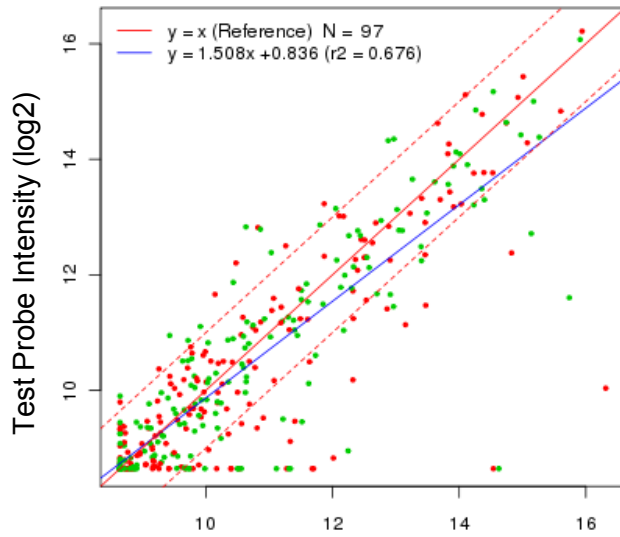

### B. Impact of 1 Mismatch on Ratios

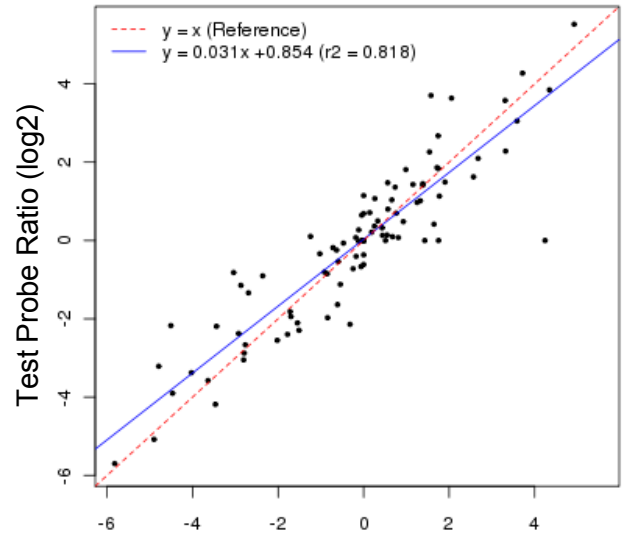

### C. Impact of 3 Mismatches on Intensities

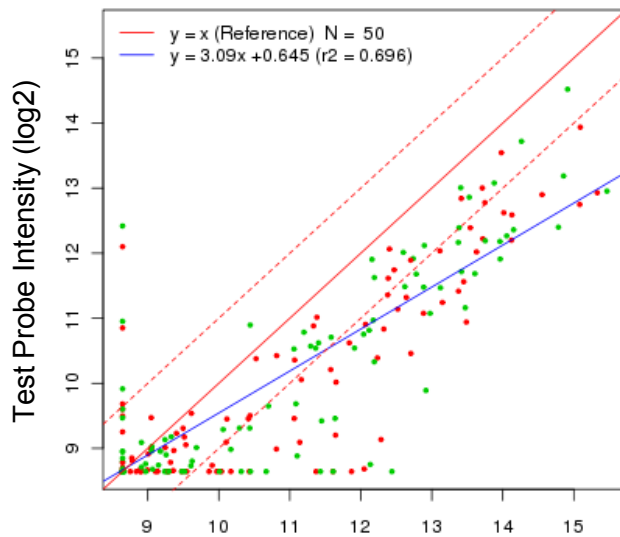

### D. Impact of 3 Mismatches on Ratios

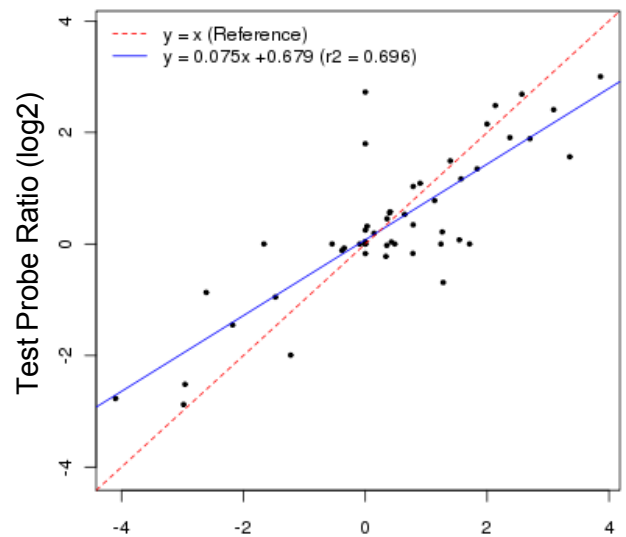

### E. Impact of 7 Mismatches on Intensities

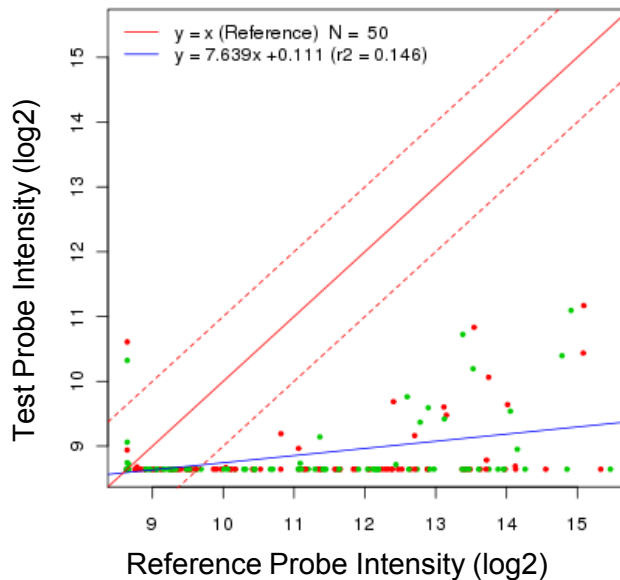

### F. Impact of 7 Mismatches on Ratios

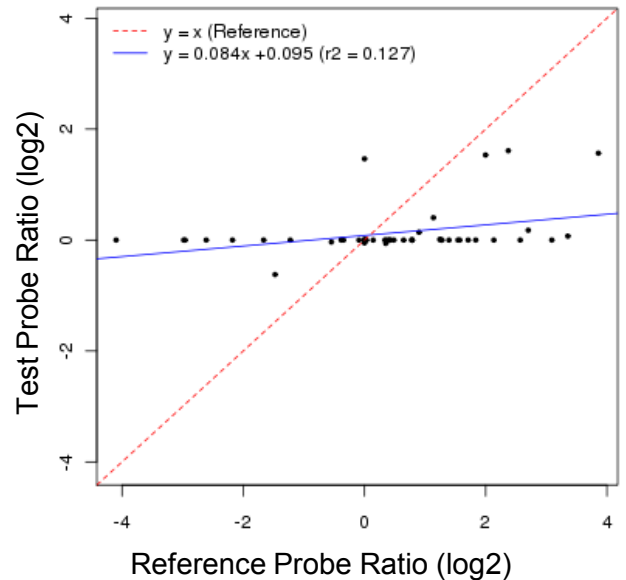

Supplement: 1471-2164-13-434-S2.pdf [file 1471-2164-13-434-S2.pdf]
