# Supplementary material for: Transcriptome profiling in conifers and the PiceaGenExpress database show patterns of diversification within gene families and interspecific conservation in vascular gene expression
Source: PubMed Central journal article supplement (PMC3534630; doi:10.1186/1471-2164-13-434), 2012-08-29
Supplement: 1471-2164-13-434-S3.pdf [file 1471-2164-13-434-S3.pdf]

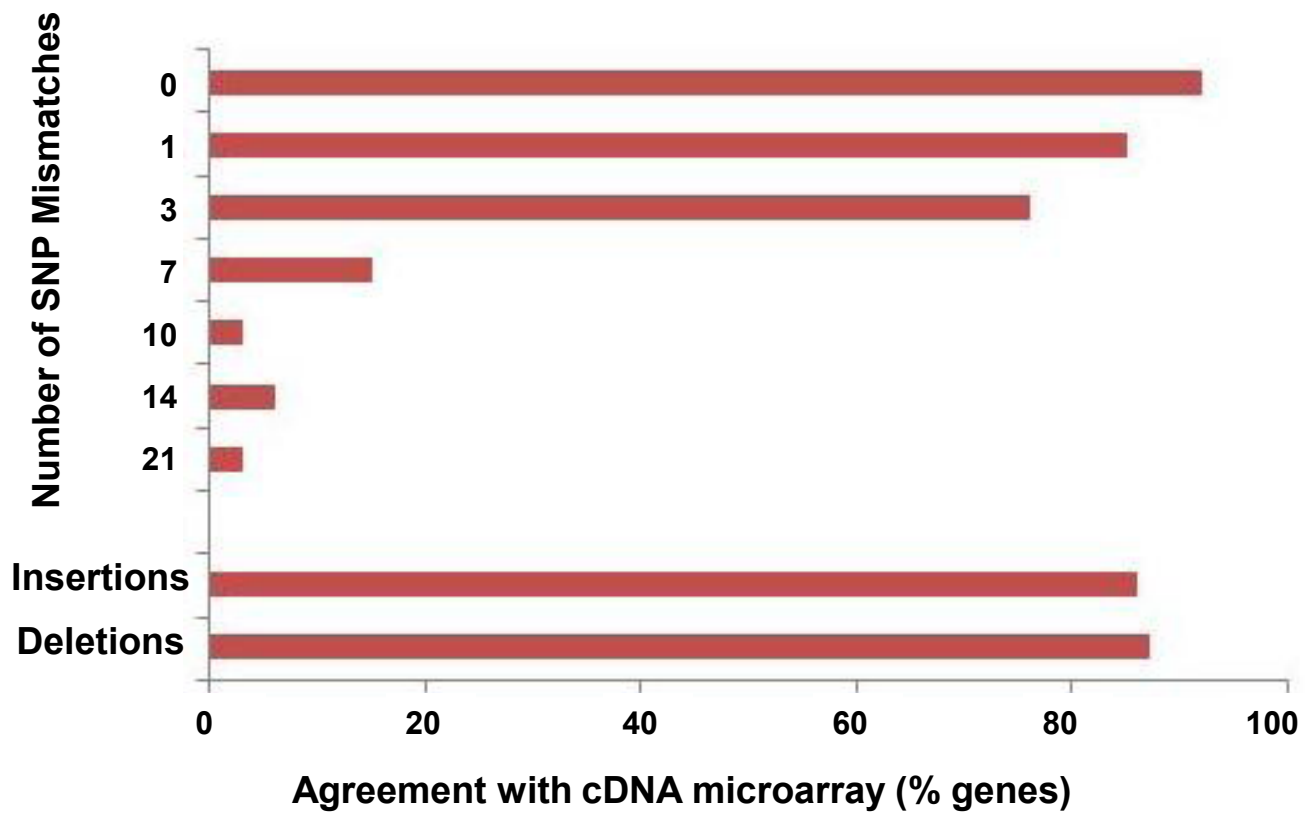

Additional figure 2
